# Supplementary material for: Facile and green synthesis of palladium nanoparticles loaded into cyclodextrin nanofibers and their catalytic application in nitroarene hydrogenation
Source: Royal Society of Chemistry journal article supplement (doi:10.1039/c8nj05133j), 2019-01-01
Supplement: c8nj05133j1.pdf [file c8nj05133j1.pdf]

## SUPPORTING INFORMATION

for

New Journal of Chemistry

---

# Facile and Green Synthesis of Palladium Nanoparticles Loaded into Cyclodextrin Nanofibers and Their Catalytic Application to Nitroarene Hydrogenation

*Asli Celebioglu<sup>a</sup>, Fuat Topuz<sup>a</sup> and Tamer Uyar<sup>a,b\*</sup>*

*<sup>a</sup>Institute of Materials Science & Nanotechnology, Bilkent University, 06800, Ankara, Turkey*

*<sup>b</sup>Department of Fiber Science and Apparel Design, College of Human Ecology, Cornell University, Ithaca, NY, 14853, USA*

*\* To whom correspondence should be addressed: Prof. Tamer Uyar ([tu46@cornell.edu](mailto:tu46@cornell.edu))*

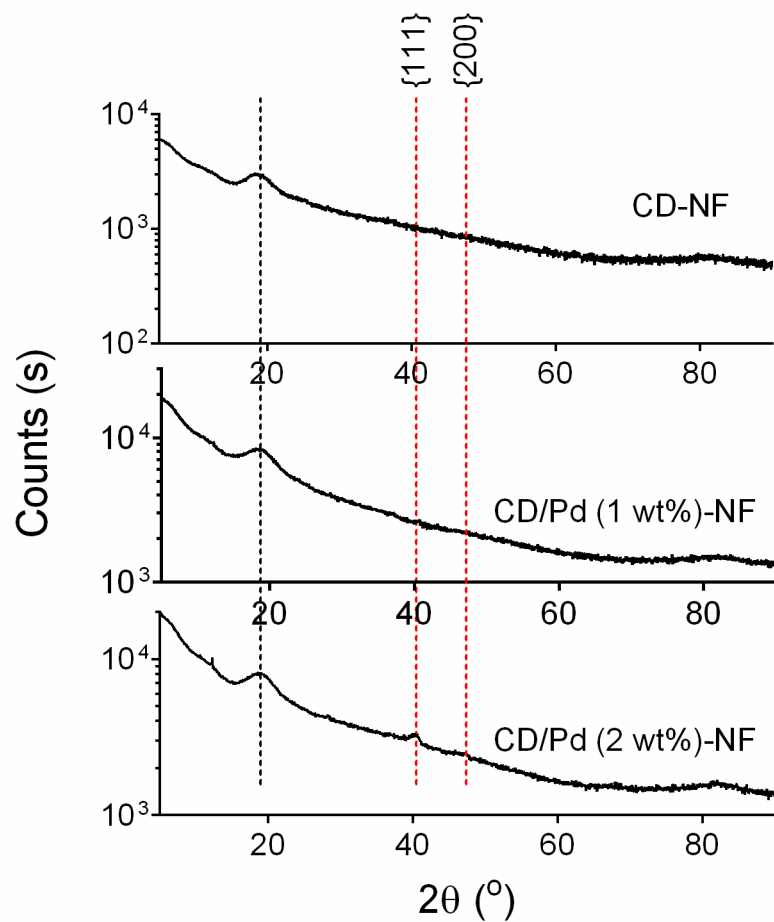

**Figure S1.** Wide-angle XRD patterns of the HP- $\beta$ -CD nanofibers with different Pd loadings.

**Table S1.** Catalytic performance of Pd-NPs on different supports for PNP reduction.

| Sample                                      | Pd-NP size (nm) | $c_{\text{Pd}}$ (mM) | $c_{\text{PNP}}$ (mM) | TOF ( $\text{s}^{-1}$ ) | Reference    |
|---------------------------------------------|-----------------|----------------------|-----------------------|-------------------------|--------------|
| Pd/ZnO                                      | 2.3             | 3.05                 | 10                    | 0.00025                 | <sup>1</sup> |
| CD/Pd NF (DMF)                              | 4               | 0.035                | 0.063                 | 0.0034                  | This study   |
| CD/Pd NF (Water)                            | 5               | 0.035                | 0.063                 | 0.0028                  | This study   |
| Pd/SnO <sub>2</sub> /PANI                   | 3               | 0.016                | 0.23                  | 0.137                   | <sup>2</sup> |
| Pd/Fe <sub>3</sub> O <sub>4</sub> /graphene | 5               | 0.031                | 1.85                  | 1.75                    | <sup>3</sup> |
| Pd/SBA15                                    | 7               | 0.063                | 0.1                   | 0.0053                  | <sup>4</sup> |

**References.**

1. M.-R. Kim and S.-H. Choi, *Journal of Nanomaterials*, 2009, **2009**, 7.
2. X. Lu, Y. Xue, G. Nie and C. Wang, *Catal. Lett.*, 2012, **142**, 566-572.
3. X. Li, X. Wang, S. Song, D. Liu and H. Zhang, *Chemistry – A European Journal*, 2012, **18**, 7601-7607.
4. J. Morère, M. J. Torralvo, C. Pando, J. A. R. Renuncio and A. Cabañas, *RSC Advances*, 2015, **5**, 38880-38891.
